# Supplementary material for: Evaluation of PD-L1 Expression and HPV Genotyping in Anal Squamous Cell Carcinoma
Source: PubMed Central journal article supplement (PMC7564961; doi:10.3390/cancers12092516), 2020-09-04
Supplement: cancers-12-02516-s001.pdf [file cancers-12-02516-s001.pdf]

Supplementary Materials

## Evaluation of PD-L1 expression and HPV genotyping in anal squamous cell carcinoma

Anja Wessely, Markus V. Heppt, Claudia Kammerbauer, Theresa Steeb, Thomas Kirchner, Michael J. Flaig, Lars E. French, Carola Berking, Elisa Schmoeckel and Markus Reinholz

**Table S1.** Patients infected with multiple human papillomavirus (HPV) subtypes. All of the patients were diagnosed with tumors located in the anal canal or sphincter (ICD-10 code C21.1).

| Case no. | Sex    | Number of detected HPV subtypes | HPV subtype category* |                       |           |
|----------|--------|---------------------------------|-----------------------|-----------------------|-----------|
|          |        |                                 | Carcinogenic          | Possibly carcinogenic | No group  |
| 16       | Female | 2                               | HPV16                 | HPV73                 | -         |
| 22       | Male   | 3                               | HPV16                 | -                     | HPV54, 90 |
| 35       | Female | 3                               | HPV16, 18, 33         | -                     | -         |
| 39       | Female | 2                               | HPV16                 | HPV53                 | -         |

\* according to the International Agency for Research on Cancer (IARC).

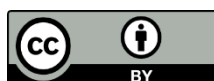

© 2020 by the authors. Licensee MDPI, Basel, Switzerland. This article is an open access article distributed under the terms and conditions of the Creative Commons Attribution (CC BY) license (<http://creativecommons.org/licenses/by/4.0/>).
